# Supplementary material for: Electrical characterization of Ag/MoO3−x/p-Si Schottky diodes based on MoO3−x synthesized via sol–gel method: an investigation on frequency and voltage dependence
Source: Springer Nature journal article supplement (doi:10.1007/s10854-024-12559-8), 2024-04-01
Supplement: MOESM1 [file 26998892]

**Supplementary Information**

**Electrical Characterization of Ag/MoO3-x/p-Si Schottky Diodes Based on MoO3-x Synthesized via Sol-Gel Method: An Investigation on Frequency and Voltage Dependence**

Adem MUTLU a,*, Cem TOZLUb

a Solar Energy Institute, Ege University, 35100, Evka 3, Izmir, Turkey

b Graphene Application and Research Center, Izmir Katip Celebi University, 35620, Cigli, Izmir, Turkey

***Corresponding authors E-mail****:* [*adem.mutlu@ege.edu.tr*](mailto:adem.mutlu@ege.edu.tr)*, (M. Adem)*

This file includes:

Supplementary Information S1 to S3

Table S1

**
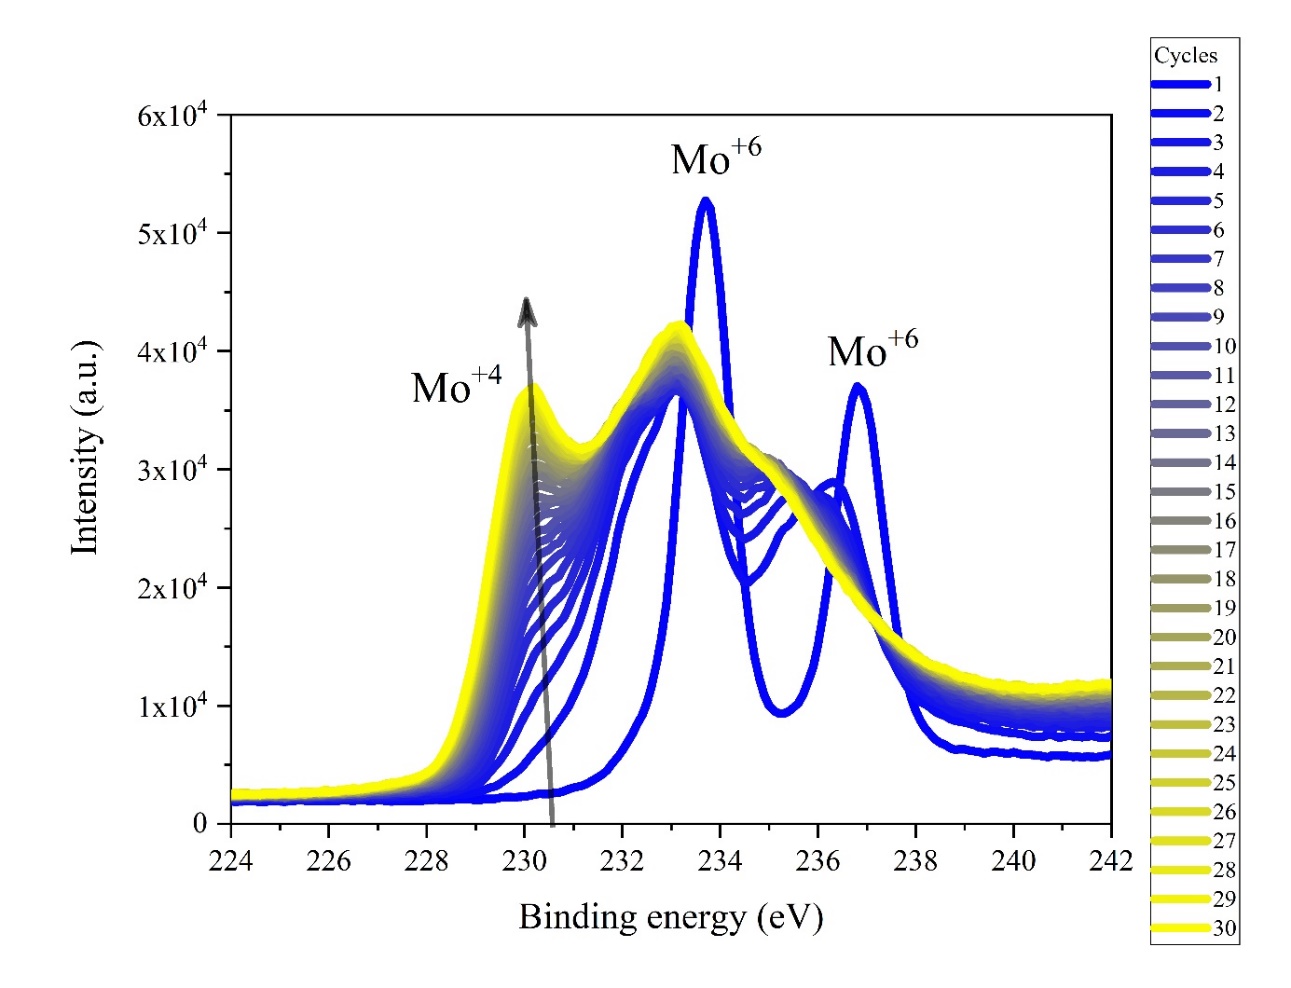

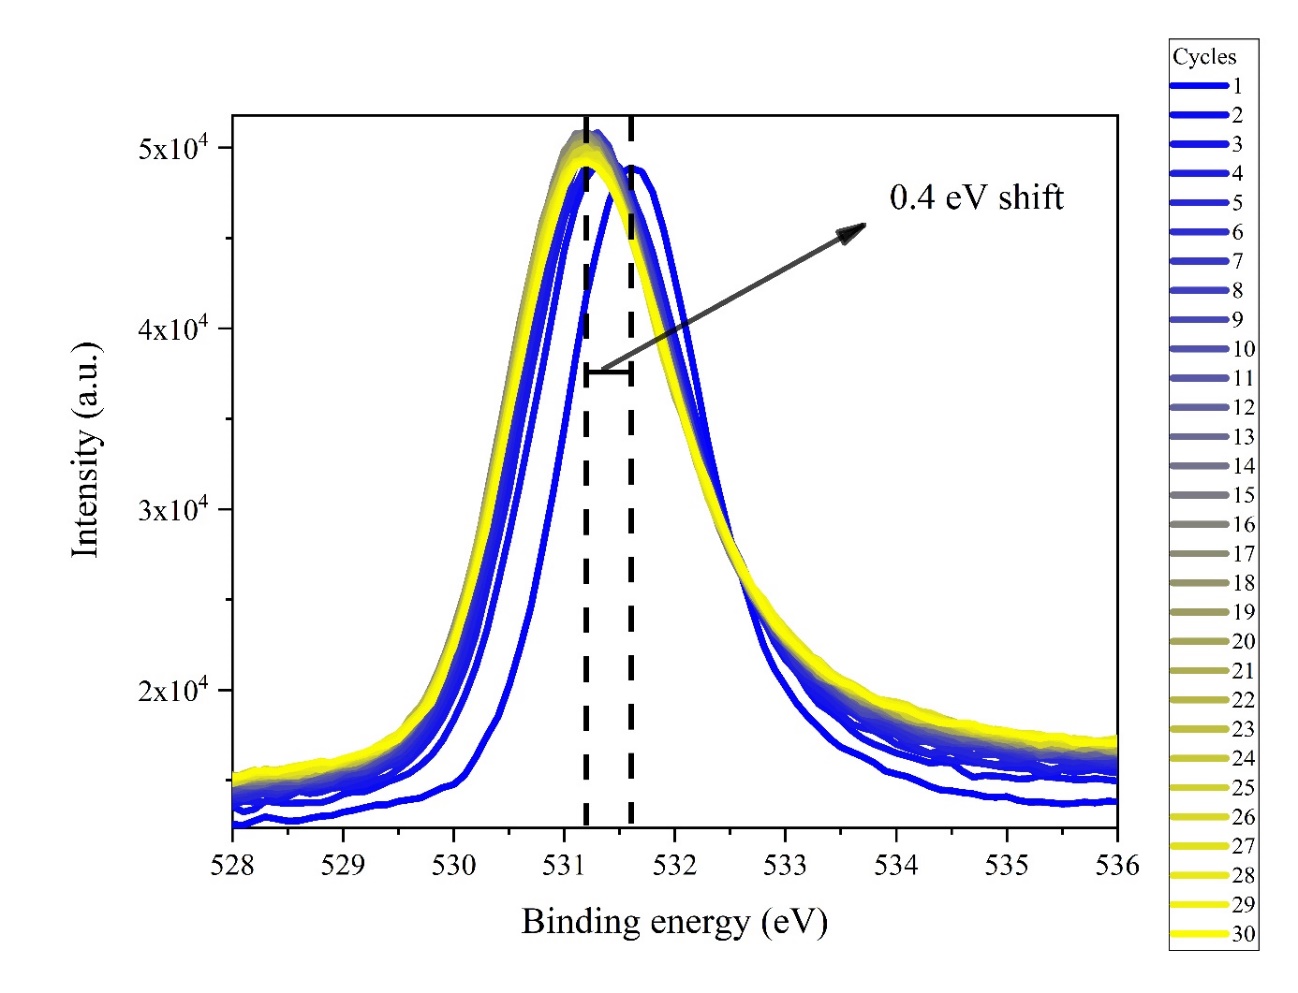
Figure S1**. Mo 3d Xps dept profile.

**Figure S2**. O 1s Xps dept profile.


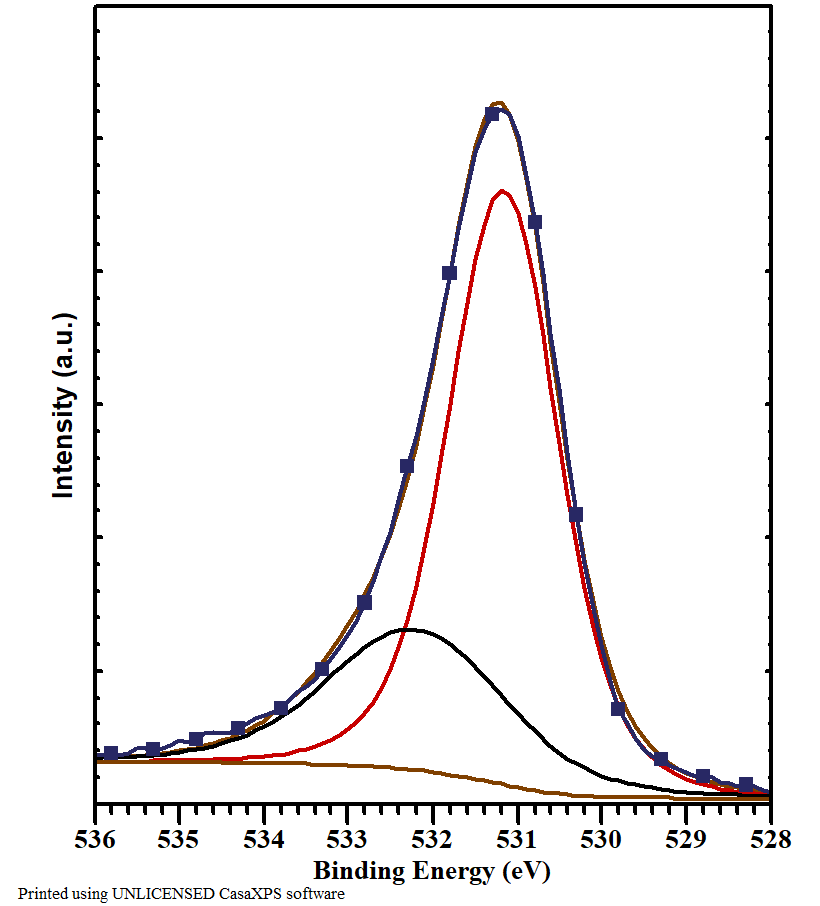

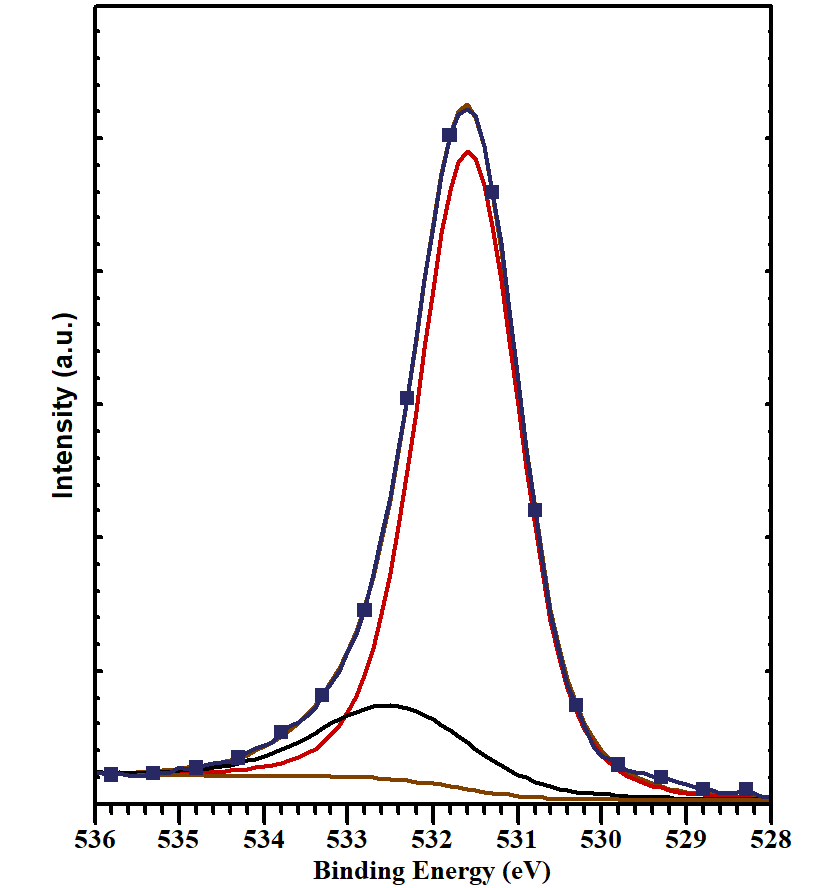


**Figure S3.** a) 1. Cycle and b) 30. Cycle of O1s Xps peak obtained from dept profile Xps measurements.

**Table S1.** Comparison of ideality factors (*n*) of MoO3-based Schottky diodes fabricated by coating with different methods in this study and the literature

| **Device Structure** | **MoO3 Deposition method** | **İdeality factor** | **Ref.** |
| --- | --- | --- | --- |
| n-Si/MoO3-Ta2O5/Pt | Thermal evaporation | 5.92 | (Yu et al., 2013) |
| n-Si/MoO3-La2O3/Pt | Thermal evaporation | 5.23 | (Yu et al., 2013) |
| n-Si/MoO3 /Pt | Thermal evaporation | 1.77 | (Yu et al., 2013) |
| n-Si/MoO3/Cr | Thermal evaporation | 1.25 | (Çaldıran et al., 2021) |
| n-Si/MoO3/Ag | Atomic layer deposition (ALD) | 13.3 | (Basyooni et al., 2023) |
| n-Si/MoO3-x/Au | Thermal evaporation | 1.55 | (Mahato et al., 2019) |
| p-si/MoO3/Al | Thermal evaporation | 1.54 | (Özden, 2021) |
| p-si/MoO3/Cr | Thermal evaporation | 1.22 | (Çaldıran et al., 2021) |
| p-Si/MoO3/Au | Thermal evaporation | 3.48 | (Mansour et al., 2021) |
| p-InP/MoO3/Al | Thermal evaporation | 2.5 | (Chen et al., 2016) |
| p-Si/Ba-MoO3/Cu | Jet nebulizer spray pyrolysis | 1.92 | (Vivek et al., 2019) |
| p-Si/Y-MoO3/Cu | jet nebuliser spray paralysis | 1.7 | (Vivek et al., 2022) |
| p-si/MoO3/Ag | jet nebuliser spray paralysis | 7.19 | (Balaji et al., 2016) |
| p-Si/MoO3-x/Ag | Spin coating | 1.9  (This work) |  |

**References**

Balaji, M., Chandrasekaran, J., & Raja, M. (2016). Role of substrate temperature on MoO3 thin films by the JNS pyrolysis technique for P-N junction diode application. *Materials Science in Semiconductor Processing*, *43*, 104–113. https://doi.org/10.1016/j.mssp.2015.12.009

Basyooni, M. A., Gaballah, A. E. H., Tihtih, M., Derkaoui, I., Zaki, S. E., Eker, Y. R., & Ateş, Ş. (2023). Thermionic Emission of Atomic Layer Deposited MoO3/Si UV Photodetectors. *Materials*, *16*(7). https://doi.org/10.3390/ma16072766

Çaldıran, Z., Taşyürek, L. B., & Nuhoğlu, Y. (2021). The effect of different frequencies and illuminations on the electrical behavior of MoO3/Si heterojunctions. *Journal of Materials Science: Materials in Electronics*, *32*(23), 27950–27961. https://doi.org/10.1007/s10854-021-07176-8

Chen, J., Lv, J., & Wang, Q. (2016). Electronic properties of Al/MoO3/p-InP enhanced Schottky barrier contacts. *Thin Solid Films*, *616*, 145–150. https://doi.org/10.1016/j.tsf.2016.08.019

Mahato, S., Voz, C., Biswas, D., Bhunia, S., & Puigdollers, J. (2019). Defect states assisted charge conduction in Au/MoO3-x/n-Si Schottky barrier diode. *Materials Research Express*, *6*(3). https://doi.org/10.1088/2053-1591/aaf49f

Mansour, A. M., Gad, S. A., Moustafa, & A. M., & Mahmoud, G. M. (2021). *Structural, Morphological, and Optical Characterization of MoO 3 Thin Films and MoO 3 /p-Si Based Diode*. https://doi.org/10.1007/s12633-021-01014-6/Published

Özden, Ş. (2021). Improvement effect of the MoO3 interface layer on the p-Si-based Schottky diode. *Journal of Materials Science: Materials in Electronics*, *32*(7), 9567–9573. https://doi.org/10.1007/s10854-021-05619-w

Vivek, P., Chandrasekaran, J., & Balasubramani, V. (2022). Fabrication of Cu/Y-MoO3/p-Si type Schottky barrier diodes by facile spray pyrolysis technique for photodetection application. *Sensors and Actuators A: Physical*, *335*. https://doi.org/10.1016/j.sna.2021.113361

Vivek, P., Chandrasekaran, J., Marnadu, R., Maruthamuthu, S., & Balasubramani, V. (2019). Incorporation of Ba2+ ions on the properties of MoO3 thin films and fabrication of positive photo-response Cu/Ba–MoO3/p-Si structured diodes. *Superlattices and Microstructures*, *133*. https://doi.org/10.1016/j.spmi.2019.106197

Yu, J., Liu, Y., Cai, F. X., Shafiei, M., Chen, G., Motta, N., Wlodarski, W., Kalantar-Zadeh, K., Lai, P. T., & Yu, J. (2013). *A comparison study on hydrogen sensing performance of Pt/MoO 3 nanoplatelets coated with a thin layer of Ta 2 O 5 or La 2 O 3*. https://doi.org/10.1109/NEMS.2013.6559712
